# Supplementary material for: A new entry to 9-azabicyclo[3.3.1]nonanes using radical translocation/cyclisation reactions of 2-(but-3-ynyl)-1-(o-iodobenzoyl)piperidinesElectronic supplementary information (ESI) available: Experimental details for 5–16. See http://www.rsc.org/suppdata/p1/b2/b203243k/
Source: Royal Society of Chemistry journal article supplement (doi:10.1039/b203243k), 2002-05-13
Supplement: b203243k.doc [file b203243k.doc]

**Supplementary data**

**A new entry to 9-azabicyclo[3.3.1]nonanes using radical translocation/cyclisation reactions of 2-(but-3-ynyl)-1-(*o*-iodobenzoyl)piperidines**

**Tatsunori Sato, Taro Yamazaki, Yumi Nakanishi, Jun-ichi Uenishi and Masazumi Ikeda***

*Kyoto Pharmaceutical University, Misasagi, Yamashina, Kyoto 607-8414, Japan*

**Methyl 1-(*tert*-butoxycarbonyl)piperidine-2-carboxylate** **5**

To a stirred solution of pipecolinic acid (piperidine-2-carboxylic acid; 2.67 g, 20.7 mmol) in absolute methanol (15 cm3) was added dropwise thionyl chloride (2.71 g, 22.8 mmol) under a nitrogen atmosphere at 0 ˚C and the whole was refluxed for 1 hr. After evaporation of the mixture, the residue was suspended in AcOEt (30 cm3) containing triethylamine (5.24 g, 51.8 mmol) and the resulting mixture was stirred vigorously at room temperature for 10 min. To this suspension was added slowly a solution of di-*tert-*butyl dicarbonate (4.98 g, 22.8 mmol) in AcOEt (20 cm3) at 0 ˚C and the whole was stirred at room temperature for 16 h. After the mixture had been poured into water (40 cm3), the organic phase was separated and the aqueous phase was extracted with AcOEt. The combined organic phase was washed successively with 5% HCl, saturated aq. NaHCO3 and brine, dried (MgSO4). Evaporation of the mixture gave **5**5 (5.05 g, quant.), which was used for the next step without further purification, *H* (60 MHz) 0.9-1.7 (5 H, m), 1.48 (9 H, s, Bu*t*), 2.1-2.4 (1 H, m), 2.8-3.2 (1 H, m, one of 6-H2), 3.72 (3 H, s, OMe), 3.75-4.1 (1 H, m, one of 6-H2) and 4.7-4.95 (1 H, br, 2-H).

**Methyl 1-(*tert*-butoxycarbonyl)-2-(prop-2-enyl)piperidine-2-carboxylate 6**

To a solution of hexamethyldisilazane (3.98 g, 24.7 mmol) in THF (20 cm3) at -78 °C under a nitrogen atmosphere was added dropwise a 1.6 mol dm-3 solution of butyllithium in hexane (15.4 cm3, 24.7 mmol) and the mixture was stirred for 20 min. To this mixture was added a solution of **5** (4.00 g, 16.4 mmol) in THF (10 cm3) at -78 °C and the whole was stirred for 15 min. After a solution of allyl bromide (2.98 g, 24.7 mmol) had been added slowly at -78 °C, it was stirred at room temperature for 16 h. The reaction mixture was quenched with 5% HCl (20 cm3) at 0 ˚C and the solution was stirred for 5 min, extracted with diethyl ether, dried (MgSO4), and concentrated. The residue was chromatographed on silica gel [hexane-AcOEt (20:1)] to give **6** (3.92 g, 84%) as a colourless oil [Found: (M+H)+, 284.1862. C15H26NO4 requires *M*H+, 284.1874]; max (CCl4)/cm-1 1745 and 1700; *H* (60 MHz) 1.3-2.2 (6 H, m), 1.42 (9 H, s, Bu*t*), 2.6-3.2 (1 H, m, one of 6-H2), 2.74 (2 H, br t, *J* 6.5), 3.6-4.0 (1 H, m, one of 6-H2), 3.69 (3 H, s, OMe), 4.85-5.25 (2 H, m, CH=C*H*2) and 5.6-6.3 (1 H, m, C*H*=CH2).

**Methyl 1-(*tert*-butoxycarbonyl)-2-(3-hydroxypropyl)piperidine-2-carboxylate 7a**

A 2.0 mol dm-3 solution of 2-methylbut-2-ene (26.5 cm3, 53.0 mmol) in THF was added at –15 ˚C to a solution of BH3-THF complex (1.0 mol dm-3 solution in THF, 26.5 cm3, 26.5 mmol) and the mixture was stirred at 0 ˚C for 1 h. To the resulting solution of bis(3-methylbutan-2-yl)borane was added dropwise a solution of **6** (3.00 g, 10.6 mmol) in THF (10 cm3). The mixture was stirred at room temperature for 1 h after which a 30% aq. solution of H2O2 (23 cm3) and 20% aq. NaOH (10 cm3) were carefully added to the mixture at 0 ˚C. After the solution had been stirred at room temperature for 1 h, it was extracted with diethyl ether. The extract was washed with brine, dried (MgSO4) and concentrated. The residue was chromatographed on silica gel [hexane-AcOEt (1:1)] to give **7a** (3.17 g, 99%) as a colourless oil [Found: (M+H)+, 302.1978. C15H28NO5 requires *M*H+, 302.1967]; max (CCl4)/cm-1 3670, 3550, 1740 and 1695; *H* (60 MHz) 1.0-2.25 (11 H, m), 1.43 (9 H, s, Bu*t*), 2.8-4.0 (4 H, m) and 3.70 (3 H, s, OMe).

**Methyl 1-(*tert*-butoxycarbonyl)-2-(2-formylethyl)piperidine-2-carboxylate 13a**

To a solution of oxalyl chloride (758 mg, 5.97 mmol) in DCM (5 cm3) was added dropwise a solution of dimethyl sulfoxide (933 mg, 11.94 mmol) in DCM (5 cm3) at –78 ˚C over a period of 10 min after which the mixture was stirred at the same temperature for 10 min. After this, a solution of **7a** (1.20 g, 3.98 mmol) in DCM (10 cm3) was added at –78 ˚C to the mixture which was then stirred at the same temperature for 1 h. After addition of triethylamine (2.01 g, 19.90 mmol) to the mixture, it was allowed to warm to room temperature with vigorous stirring. After 30 min, the mixture was diluted with water (10 cm3) and the organic phase was separated. The aqueous phase was extracted with diethyl ether, then the combined organic phase was washed with 5% HCl and brine, dried (MgSO4), and concentrared. The crude material was chromatographed on silica gel [hexane-AcOEt (3:1)] to give **13a** (1.17 g, 98%) as a colourless oil [Found: (M+H)+, 300.1819. C15H26NO5 requires *M*H+, 300.1811]; max (CCl4)/cm-1 1740 and 1695; *H* (60 MHz) 1.3-1.95 (8 H, m), 1.43 (9 H, s, Bu*t*), 2.0-4.1 (4 H, m), 3.71 (3 H, s, OMe) and 9.73 (1 H, br s, CHO).

**Methyl 2-(4,4-dibromobut-3-enyl)-1-(*tert*-butoxycarbonyl)piperidine-2-carboxylate 14a**

Bromoform (3.04 g, 3.00 mmol) was added dropwise at –20 ˚C to a solution of triphenylphosphine (3.15 g, 12.03 mmol) and potassium *tert-*butoxide (undissolved, 1.35 g, 12.03 mmol) in toluene (20 cm3) and the mixture was stirred at the same temperature for 15 min. A solution of **13a** (900 mg, 3.00 mmol) in toluene (20 cm3) was added to the mixture after which it was stirred at room temperature for 1 h. After dilution of the mixture with diethyl ether (80 cm3) the resulting precipitate was filtered off and washed with diethyl ether. The filtrate was concentrated and the residue was chromatographed on silica gel [hexane-AcOEt (7:1)] to give **14a** (1.37 g, quant.) as a colourless oil [Found: (M+H)+, 454.0240. C16H2679Br2NO4 requires *M*H+, 454.0229]; max (CCl4)/cm-1 1740 and 1695; *H* (60 MHz) 1.2-2.4 (10 H, m), 1.44 (9 H, s, Bu*t*), 2.8-3.3 (1 H, m), 3.6-4.1 (1 H, m), 3.70 (3 H, s, OMe) and 6.25-6.55 (1 H, t like m).

**Methyl 1-(*tert*-butoxycarbonyl)-2-[4-(trimethylsilyl)but-3-ynyl]piperidine-2-carboxylate 15a**

To a solution of **14a** (642 mg, 1.41 mmol) in THF (10 cm3) at –78 ˚C under a nitrogen atmosphere were added successively TMEDA (385 mg, 3.31 mmol) and a 1.6 mol dm-3 solution of butyllithium in hexane (2.2 cm3, 3.53 mmol) and the whole was stirred at the same temperature for 1 h. Trimethylsilyl chloride (257 mg, 2.36 mmol) was added to the reaction mixture after which it was stirred at room temperature for 2 h. The mixture was diluted with saturated aq. NaHCO3 and extracted with diethyl ether. The extract was washed with brine, dried (MgSO4) and concentrated. The residue was chromatographed on silica gel [hexane-AcOEt (10:1)] to give **15a** (367 mg, 71%) as a colourless oil [Found: (M+H)+, 368.2265. C19H34NO4Si requires *M*H+, 368.2257]; max (CCl4)/cm-1 2160, 1740 and 1695; *H* (60 MHz) 0.14 (9 H, s, SiMe3), 1.3-2.4 (10 H, m), 1.43 (9 H, s, Bu*t*), 2.8-3.25 (1 H, m), 3.6-4.0 (1 H, m), 3.70 (3 H, s, OMe).

**Methyl 1-(*o*-iodobenzoyl)-2-[4-(trimethylsilyl)but-3-ynyl]piperidine-2-carboxylate 16a**

Trimethylsilyl iodide (1.69 g, 8.43 mmol) was added dropwise to a solution of **15a** (2.30 g, 6.25 mmol) in acetonitrile (5 cm3) at room temperature. After the mixture had been stirred for 15 min, methanol (55 mg, 1.73 mmol) and saturated aq. NaHCO3 were added to it. The mixture was extracted with diethyl ether and the extract was dried (Na2SO4) and concentrated. The residue was dissolved in benzene (20 cm3) and to this solution were added at 0 ˚C successively DMAP (86 mg, 0.70 mmol), triethylamine (1.42 g, 14.00 mmol), and a solution of *o*-iodobenzoyl chloride (3.79 g, 14.00 mmol) in benzene (20 cm3). The reaction mixture was sirred overnight at room temperature, then it was diluted with water (20 cm3) and extracted with diethyl ether. The extract was washed with 5% HCl, saturated aq. NaHCO3 and brine, dried (MgSO4) and concentrated. The residue was chromatographed on silica gel [hexane-AcOEt (10:1)] to give **16a** (2.67 g, 86%), mp 110-111.5 ˚C (from hexane-AcOEt) (Found: C, 50.78; H, 5.75; N, 2.84. C21H28INO3Si requires C, 50.71; H, 5.67; N, 2.82%); max (CCl4)/cm-1 2160, 1735 and 1645; *H* (60 MHz) 0.15 (9 H, s, SiMe3), 1.4-2.9 (10 H, m), 3.0-3.45 (2 H, m), 3.75 (3 H, s, OMe), 6.85-7.5 (3 H, m, ArH) and 7.81 (1 H, br d, *J* 7.5, ArH).

***tert*-Butyl 2-(hydroxymethyl)piperidine-1-carboxylate 9b**

To a suspension of LiAlH4 (575 mg, 115.2 mmol) in dry diethyl ether (20 cm3) was added dropwise a solution of **5** (3.00 g, 12.3 mmol) in dry diethyl ether (10 cm3) at 0 ˚C and the resulting mixture was stirred at the same temperature for 30 min. Water was added carefully to decompose an excess amount of the reagent. The precipitate was filtered off and the filtrate was dried (MgSO4) and concentrated. The residue was chromatographed on silica gel (AcOEt) to give **9b** (2.50 g, 95%), mp 74.5-75.5 ˚C (from hexane-AcOEt) (Found: C, 61.45; H, 9.85; N, 6.60. C11H21NO3 requires C, 61.37; H, 9.83; N, 6.51) [Found: (M+H)+, 216.1604. C11H22NO3 requires *M*H+, 216.1599]; max (KBr)/cm-1 3433, 1690 and 1668; *H* (400 MHz; CDCl3) 1.31-1.48 (3 H, m), 1.428 and 1.434 (total 9 H, both s, Bu*t*), 1.51-1.62 (2 H, m), 1.64-1.71 (1 H, m), 2.83 (1 H, br t, *J* 12.2, one of 6-H2), 3.57 (1 H, dd, *J* 10.8 and 6.2), 3.73-3.79 (1 H, m), 3.91 (1 H, br d, *J* 12.2, one of 6-H2) and 4.22-4.29 (1 H, m, 2-H).

***tert*-Butyl 2-formylpiperidine-1-carboxylate 10b**

Following the procedure described for the preparation of **13a**, **9b** (2.40 g, 11.1 mmol) was oxidised by treatment with oxalyl chloride (2.15 g, 16.9 mmol), dimethyl sulfoxide (2.12 g, 27.1 mmol), and triethylamine (5.67 g, 56.0 mmol) in DCM. The crude product was chromatographed on silica gel [hexane-AcOEt (5:1)] to give **10b** (2.13 g, 90%) as a colourless oil [Found: (M+H)+, 214.1452. C11H20NO3 requires *M*H+, 214.1443]; max (film)/cm-1 1735 and 1693; *H* (400 MHz; CDCl3) 1.20-1.76 (5 H, m), 1.46 and 1.47 (total 9 H, both s, Bu*t*), 2.13-2.24 (1 H, m), 2.80-3.04 (1 H, br), 3.84-4.10 (1 H, br), 4.47-4.68 (1 H, br) and 9.59 (1 H, s, CHO).

**Ethyl (*E*)- and (*Z*)-3-[1-(*tert*-butoxycarbonyl)piperidin-2-yl]propenoate 11b**

To a solution of triethyl phosphonoacetate (116 mg, 0.52 mmol) in THF (3 cm3) was added a 1.6 mol dm-3 solution of butyllithium in hexane (0.33 cm3, 8.8 mmol) at 0 ˚C and the solution was stirred for 10 min. A solution of **10b** (100 mg, 0.47 mmol) in THF (3 cm3) was added at the same temperature after which the whole was stirred at room temperature for 2 h. After evaporation of the mixture, the residue was chromatographed on silica gel [hexane-AcOEt (10:1)] to give a mixture of the (*E*)- and (*Z*)-unsaturated ester **11b** (121 mg, 91%) in a ratio of 71:29 as a colourless oil [Found: (M+H)+, 284.1867. C15H26NO4 requires *M*H+, 284.1862]; max (film)/cm-1 1738 and 1697; *H* (400 MHz; CDCl3) 1.29 (3 H x 29/100, t, *J* 7.1), 1.30 (3 H x 71/100, t, *J* 7.1), 1.37-1.50 (1 H, m), 1.41 (9 H x 29/100, s), 1.46 (9 H x 71/100, s), 1.57-1.86 (5 H, m), 2.82 (0.71 H, td, *J* 12.7 and 2.6), 2.94 (0.29 H, td, *J* 12.9 and 3.0), 3.95-4.05 (1 H, m), 4.18 (2 H x 29/100, q, *J* 7.1), 4.20 (2 H x 71/100, q, *J* 7.1), 4.95 (0.71 H, br s, *W*1/2 16), 5.74-5.76 (0.29 H, m), 5.80 (0.29 H, dd, *J* 11.6 and 1.6), 5.81 (0.71 H, dd, *J* 15.9 and 2.1), 6.42 (0.29 H, dd, *J* 11.6 and 8.5) and 6.87 (0.71 H, dd, *J* 15.9 and 4.0).

**Ethyl 3-[1-(*tert*-butoxycarbonyl)piperidin-2-yl]propanoate 12b**

A solution of **11b** (100 mg, 0.35 mmol) in AcOEt (10 cm3) was hydrogenated in the presence of 10% Pd-C (100 mg) under pressure (5 kg cm–2) for 24 h. After the catalyst had been removed by filtration, the filtrate was concentrated. The residue was chromatographed on silica gel (AcOEt) to give **12b** (99 mg, 99%) as a colourless oil [Found: (M+H)+, 286.2010. C15H28NO4 requires *M*H+, 286.2018]; max (film)/cm-1 1737 and 1690; *H* (400 MHz; CDCl3) 1.25 (3 H, t, *J* 7.1, CH2*Me*), 1.51-1.73 (7 H, m), 1.45 (9 H, s, Bu*t*), 2.02-2.13 (1 H, m), 2.20-2.34 (2 H, m), 2.75 (1 H, br t, *J* 13.0), 3.93-4.02 (1 H, br), 4.12 (2 H, q, *J* 7.1, C*H*2Me) and 4.21-4.27 (1 H, br).

***tert*-Butyl 2-(3-hydroxypropyl)piperidine-1-carboxylate 7b**

Following the procedure described for the preparation of **9b**, **12b** (900 mg, 3.15 mmol) was reduced with LiAlH4 (179 mg, 4.72 mmol) in diethyl ether (10 cm3) at 0 ˚C and the crude product was chromatographed on silica gel (AcOEt) to give **7b** (704 mg, 92%) as a colourless oil [Found: (M+H)+, 244.1905. C13H26NO3 requires *M*H+, 244.1912]; max (film)/cm-1 3435, 1689 and 1660; *H* (400 MHz; CDCl3) 1.32-1.65 (8 H, m), 1.45 (9 H, s, Bu*t*), 1.73-1.83 (1 H, m), 2.00-2.25 (2 H, br), 2.75 (1 H, br t, *J* 12.5), 3.62-3.71 (2 H, m), 3.92-4.00 (1 H, br) and 4.25 (1 H, br s, *W*1/2 20); *C* (100 MHz; CDCl3) 18.9, 25.6, 26.1, 28.4, 28.5 (3 x Me), 29.2, 38.9, 49.8, 62.6, 79.2 and 155.3.

***tert*-Butyl 2-(2-formylethyl)piperidine-1-carboxylate 13b**

Following the procedure described for the preparation of **13a**, **7b** (609 mg, 2.50 mmol) was oxidised by treatment with oxalyl chloride (863 mg, 6.80 mmol), dimethyl sulfoxide (1.06 g, 13.6 mmol) and triethylamine (1.93 g, 19.1 mmol) in DCM. The crude product was chromatographed on silica gel [hexane-AcOEt (10:1)] to give **13b** (524 mg, 87%) as a colourless oil [Found: (M+H)+, 242.1761. C13H24NO3 requires *M*H+, 242.1756]; max (film)/cm-1 1725 and 1689; *H* (400 MHz; CDCl3) 1.45 (9 H, s, Bu*t*), 1.52-1.74 (7 H, m), 2.08 (1 H, dddd, *J* 14.3, 10.4, 8.2 and 5.9), 2.36-2.52 (2 H, m), 2.72 (1 H, br t, *J* 12.5), 3.92-4.03 (1 H, br), 4.21-4.29 (1 H, br) and 9.79 (1 H, t, *J* 1.3, CHO).

***tert*-Butyl 2-(4,4-dibromobut-3-enyl)piperidine-1-carboxylate 14b**

Following the procedure described for the preparation of **14a**, **13b** (470 mg, 1.94 mmol) was treated with bromoform (1.97 g, 7.80 mmol), triphenylphosphine (2.05 g, 7.82 mmol) and potassium *tert*-butoxide (875 mg, 7.80 mmol) in toluene (5 cm3). The crude product was chromatographed on silica gel [hexane, then hexane-AcOEt (10:1)] to give **14b** (649 mg, 84%) as a colourless oil (Found: C, 42.71; H, 5.80; N, 3.93. C14H23Br2NO2 requires C, 42.34; H, 5.84; N, 3.53%); max (film)/cm-1 1691; *H* (400 MHz; CDCl3) 1.35-1.69 (7 H, m), 1.47 (9 H, s, Bu*t*), 1.79-1.89 (1H, m), 2.02-2.09 (2 H, m), 2.73 (1 H, br t, *J* 12.5), 3.94-4.05 (1 H, br), 4.17-4.26 (1 H, br) and 6.45 (1 H, t, *J* 7.2).

***tert*-Butyl 2-[4-(trimethylsilyl)but-3-ynyl]piperidine-1-carboxylate 15b**

Following the procedure described for the preparation of **15a**, **14b** (615 mg, 1.55 mmol) was treated with a 1.6 mol dm-3 solution of butyllithium in hexane (2.40 cm3, 3.84 mmol) at –78 ˚C in the presence of TMEDA (779 mg, 6.70 mmol) in THF (8 cm3), then trimethylsilyl chloride (253 mg, 2.33 mmol). The crude product was chromatographed on silica gel [hexane-AcOEt (15:1)] to give **15b** (431 mg, 90%) as a colourless oil [Found: (M+H)+, 310.2197. C17H32NO2Si requires *M*H+, 310.2203]; max (film)/cm-1 2174 and 1691; *H* (400 MHz; CDCl3) 0.14 (9 H, s, SiMe3), 1.34-1.67 (6 H, m), 1.45 (9 H, s, Bu*t*), 1.72 (1 H, br s), 1.93-2.04 (1 H, m), 2.12-2.26 (2 H, m), 2.76 (1 H, br t, *J* 12.5), 3.93-4.04 (1 H, br) and 4.20-4.28 (1H, br).

**1-(*o*-Iodobenzoyl)-2-[4-(trimethylsilyl)but-3-ynyl]piperidine 16b**

Following the procedure described for the preparation of **16a**, **15b** (398 mg, 1.29 mmol) was treated with trimethylsilyl iodide (310 mg, 1.55 mmol) in acetonitrile (8 cm3) to give the amine, which was then acylated with *o*-iodobenzoyl chloride (519 mg, 1.95 mmol) in the presence of triethylamine (329 mg, 3.25 mmol) and DMAP (157 mg, 1.29 mmol) in benzene (10 cm3). The crude mixture was chromatographed on silica gel [hexane-AcOEt (7:1)] to give **16b** (438 mg, 77%) as a colourless oil (Found: M+, 439.0827. C19H26INOSi requires *M*, 439.0829); max (film)/cm-1 2172 and 1633; *H* (400 MHz; CDCl3) (because of the presence of mainly four rotamers, the spectrum cannot be well analysed due to its complexity) 0.07, 0.11, 0.155 and 0.158 (total 9 H, all s, SiMe3, in a ratio of*ca*. 6:24:33:37, respectively), 1.25-1.37 (m), 1.50-1.97 (m), 2.03-2.20 (m), 2.24-2.44 (m) and 2.53 (ddd, *J* 17.0, 10.1 and 5.7) (total 10 H), 2.77-2.90, 3.01-3.09, 3.16-3.24, 3.48-3.54 and 3.60-3.66 (total 2 H, all m), 4.64-4.76 and 4.87-5.00 (total 1 H, both m), 7.03-7.08 (1H, m, ArH), 7.14-7.22 (1 H, m, ArH), 7.33-7.40 (1 H, m, ArH) and 7.80-7.88 (1 H, m, ArH).

**Methyl 1-(*tert*-butoxycarbonyl)-2-methylpiperidine-2-carboxylate 8**

Following the procedure described for the preparation of **6**, **5** (3.00 g, 12 33 mmol) was treated with lithium hexamethyldisilazide [prepared from hexamethyldisilazane (2.98 g, 18.50 mmol) and a 1.6 mol dm-3 solution of butyllithium in hexane (11.6 cm3, 18.50 mmol)] and then methyl iodide (17.50 g, 123.3 mmol). After work-up of the reaction mixture with 5% HCl, the ethereal extract was washed with saturated aq. NaHCO3 and brine, dried (MgSO4) and concentrated to afford **8** (3.18 g, quant.) as a colourless crystalline solid, mp 47-48 ˚C (from hexane) (Found: C, 60.96; H, 8.91; N, 5.72. C13H23NO4 requires C, 60.68; H, 9.01; N, 5.44%); max (KBr)/cm-1 1741 and 1693; *H* (300 MHz; CDCl3) 1.60-1.89 (5 H, m), 1.56 (9 H, s, Bu*t*), 1.59 (3 H, s, 2-Me), 1.93-2.04 (1 H, m), 3.10 (1 H, ddd, *J* 13.4, 10.8 and 3.9, one of 6-H2), 3.85 (3 H, s, OMe) and 3.99 (1 H, dt, *J* 13.4 and 4.9); *C* (75.4 MHz; CDCl3) 10.0, 18.4, 23.8, 28.3 (3 x Me), 31.9, 34.9, 52.0, 53.8, 87.0, 141.3 and 175.7.

***tert*-Butyl 2-hydroxymethyl-2-methylpiperidine-1-carboxylate 9c**

Following the procedure described for the preparation of **9b**, **8** (10.60 g, 41.19 mmol) was reduced with LiAlH4 (1.83 g, 48.22 mmol) in diethyl ether (80 cm3) at 0 ˚C and the crude product was chromatographed on silica gel [hexane-AcOEt (5:1)] to give **9c** (7.12 g, 75%) as a colourless oil [Found: (M+H)+, 230.1752. C12H24NO3 requires *M*H+, 230.1756]; max (CCl4)/cm-1 3600 and 1690; *H* (300 MHz; CDCl3) 1.21 (3 H, s), 1.29-1.67 (6 H, m), 1.43 (9 H, s, Bu*t*), 2.95 (1 H, ddd, *J* 13.6, 11.7 and 2.9, one of 6-H2), 3.61 (1 H, d, *J* 8.0, one of OCH2), 3.62 (1 H, d, *J* 6.0, one of OCH2), 3.83 (1 H, dt, *J* 13.6 and 4.2, one of 6-H2) and 4.72 (1 H, dd, *J* 8.0 and 6.0, OH); *C* (75.4 MHz; CDCl3) 18.2, 19.6, 24.9, 28.4 (3 x Me), 35.4, 42.5, 59.5 (2-C), 71.3 (CH2O), 80.1 (quaternary) and 156.4.

***tert*-Butyl 2-formyl-2-methylpiperidine-1-carboxylate 10c**

Following the procedure described for the preparation of **10b**, **9c** (3.00 g, 13.1 mmol) was oxidised by treatment with oxalyl chloride (1.82 g, 14.3 mmol), dimethyl sulfoxide (2.62 g, 33.5 mmol) and triethylamine (6.22 g, 61.5 mmol) in DCM. The crude product was chromatographed on silica gel [hexane-AcOEt (7:1)] to give **10c** (2.94 g, 98%) as a colourless oil [Found: (M+H)+, 228.1604. C12H22NO3 requires *M*H+, 228.1600]; max (CCl4)/cm-1 1750, 1715 and 1695; *H* (300 MHz; CDCl3) 1.21-1.32 (1 H, m), 1.30 (3 H, s, 2-Me), 1.35-1.53 (3 H, m), 1.44 (9 H, s, Bu*t*), 1.71-1.79 (2 H, m), 2.73-2.84 (1 H, m, one of 6-H2), 3.85-3.99 (1 H, br, one of 6-H2) and 9.24 (1 H, s, CHO).

**Ethyl (*E*)-3-[1-(*tert*-butoxycarbonyl)-2-methylpiperidin-2-yl]propenoate 11c**

Following the procedure described for the preparation of **11b**, **10c** (1.00 g, 4.40 mmol) was treated with lithium salt of triethyl phosphonoacetate [8.79 mmol, prepared from triethyl phosphonoacetate (1.97 g, 8.79 mmol) and a 1.6 mol dm-3 solution of butyllithium in hexane (5.5 cm3, 8.79 mmol) in THF at 0 ˚C] and the crude material was chromatographed on silica gel [hexane-AcOEt (8:1)] to give **11c** (1.18 g, 90%) as a colourless oil [Found: (M+H)+, 298.2023. C16H28NO4 requires *M*H+, 298.2018]; max (CCl4)/cm-1 1720, 1695 and 1650; *H* (300 MHz; CDCl3) 1.29 (3 H, t, *J* 7.1, CH2C*H*3), 1.35-1.76 (6 H, m), 1.40 (9 H, s, Bu*t*), 1.42 (3 H, s, 2-Me), 3.00 (1 H, ddd, *J* 13.5, 11.0 and 3.9, one of 6-H2), 3.85 (1 H, dtd, *J* 13.5, 3.8 and 0.9), 4.19 (2 H, qd, *J* 7.1 and 0.9, C*H*2CH3), 5.65 (1 H, d, *J* 16.0, CH=C*H*CO) and 7.19 (1 H, d, *J* 16.0, C*H*=CHCO); *C* (75.4 MHz; CDCl3) 14.3, 19.2, 19.6, 24.3, 28.3 (3 x Me), 38.3, 41.1, 57.3, 60.1, 80.5 (quaternary), 114.1, 130.5, 158.5 and 167.3.

**Ethyl 3-[1-(*tert*-butoxycarbonyl)-2-methylpiperidin-2-yl]propanoate 12c**

Following the procedure described for the preparation of **12b**, **11c** (1.00 g, 3.36 mmol) was hydrogenated in the presence of 10% Pd-C (100 mg) in AcOEt (10 cm3) under pressure for 24 h, and the crude product was chromatographed on silica gel [hexane-AcOEt (10:1)] to give saturated ester **12c** (926 mg, 92%) as a colourless oil [Found: (M+H)+, 300.2179. C16H30NO4 requires *M*H+, 300.2175]; max (film)/cm-1 1736 and 1683; *H* (400 MHz; CDCl3) 1.25 (3 H, t, *J* 7.1, CH2C*H*3), 1.38 (3 H, s, 2-Me), 1.46 (9 H, s, Bu*t*), 1.50-1.74 (6 H, m), 1.83-1.91 (1 H, m), 2.26-2.40 (3 H, m), 3.23-3.30 (1 H, m, one of 6-H2), 3.52-3.59 (1 H, m, one of 6-H2) and 4.12 (2 H, q, *J* 7.1, C*H*2CH3); *C* (100.5 MHz; CDCl3) 14.2, 18.4, 23.7, 25.3, 28.5 (3 x Me), 29.5, 34.6, 35.8, 41.7, 56.4, 60.3, 79.6 (quaternary), 156.1 and 174.1.

***tert*-Butyl 2-(3-hydroxypropyl)-2-methylpiperidine-1-carboxylate 7c**

Following the procedure described for the preparation of **9b**, **12c** (800 mg, 2.67 mmol) was reduced with LiAlH4 (131 mg, 3.45 mmol) in diethyl ether (10 cm3) at 0 ˚C and the crude product was chromatographed on silica gel (AcOEt) to give **7c** (577 mg, 84%) as a colourless oil [Found: (M+H)+, 258.2066. C14H28NO3 requires *M*H+, 258.2069]; max (film)/cm-1 3448 and 1682; *H* (400 MHz; CDCl3) 1.29-1.39 (1 H, m), 1.38 (3 H, s, 2-Me), 1.45 (9 H, s, Bu*t*), 1.48-1.64 (7 H, m), 1.72-1.80 (1 H, m), 1.99 (1 H, br s, OH), 2.08-2.16 (1 H, m), 3.24-3.32 (1 H, m, one of 6-H2), 3.51-3.58 (1 H, m, one of 6-H2) and 3.63 (2 H, t, *J* 6.3, CH2O).

***tert*-Butyl 2-(2-formylethyl)-2-methylpiperidine-1-carboxylate 13c**

Following the procedure described for the preparation of **13a**, **7c** (600 mg, 2.33 mmol) was treated with oxalyl chloride (656 mg, 5.17 mmol), dimethyl sulfoxide (870 mg, 11.14 mmol) and triethylamine (1.19 g, 11.76 mmol). The crude product was purified by chromatography on silica gel (AcOEt) to afford **13c** (570 mg, 96%) as a colourless oil [Found: (M+H)+, 256.1910. C14H26NO3 requires *M*H+, 256.1913]; max (film)/cm-1 1725 and 1691; *H* (400 MHz; CDCl3) 1.32-1.40 (1 H, m), 1.39 (3 H, s, 2-Me), 1.45 (9 H, s, Bu*t*), 1.46-1.66 (6 H, m), 1.78-1.89 (1 H, m), 2.40-2.49 (2 H, m), 3.27-3.34 (1 H, m, one of 6-H2), 3.46-3.53 (1 H, m, one of 6-H2) and 9.78 (1 H, t, *J* 1.8, CHO); *C* (100.5 MHz; CDCl3) 18.4, 23.7, 24.8, 28.5 (3 x Me), 31.8, 36.0, 39.3, 41.9, 56.4, 79.6 (quaternary), 155.9 and 202.7.

***tert*-Butyl 2-(4,4-dibromobut-3-enyl)-2-methylpiperidine-1-carboxylate 14c**

Following the procedure described for the preparation of **14a**, **13c** (799 mg, 3.13 mmol) was treated with bromoform (3.20 g, 12.66 mmol), triphenylphosphine (3.28 g, 12.51 mmol) and potassium *tert*-butoxide (1.40 g, 12.51 mmol) in toluene (25 cm3). The crude product was chromatographed on silica gel [hexane, then hexane-AcOEt (10:1)] to give **14c** (995 mg, 77%) as a colourless oil [Found: M+, 409.0249. C15H2579Br2NO2 requires *M*, 409.0251]; max (CCl4)/cm-1 1700; *H* (300 MHz; CDCl3) 1.30-1.40 (1 H, m), 1.39 (3 H, s, 2-Me), 1.46 (9 H, s, Bu*t*), 1.42-1.69 (6 H, m), 1.72-1.83 (1 H, m), 2.00-2.20 (2 H, m), 3.12-3.31 (1 H, m, one of 6-H2), 3.53-3.61 (1 H, m, one of 6-H2) and 6.39 (1 H, t, *J* 7.1, CH=C); *C* (75.4 MHz; CDCl3) 18.3, 23.7, 25.2, 28.1, 28.5 (quaternary), 35.7, 36.9, 41.7, 56.5, 79.3, 88.4, 138.7 and 155.9.

***tert*-Butyl 2-methyl-2-[4-(trimethylsilyl)but-3-ynyl]piperidine-1-carboxylate 15c**

Following the procedure described for the preparation of **15a**, **14b** (3.70 g, 9.00 mmol) was treated with a 1.6 mol dm-3 solution of butyllithium in hexane (14.1 cm3, 22.6 mmol) at –78 ˚C in the presence of TMEDA (2.30 g, 19.8 mmol) in THF (50 cm3), then trimethylsilyl chloride (1.47 g, 13.6 mmol). The crude product was chromatographed on silica gel [hexane-AcOEt (10:1)] to give **15c** (2.81 g, 96%) as a colourless oil [Found: (M+H)+, 324.2366. C18H34NO2Si requires *M*H+, 324.2358]; max (film)/cm-1 2158 and 1691; *H* (300 MHz; CDCl3) 0.14 (9 H, s, SiMe3), 1.30-1.40 (1 H, m), 1.37 (3 H, s, 2-Me), 1.47 (9 H, s, Bu*t*), 1.50-1.64 (5 H, m), 1.71-1.87 (2 H, m), 2.16-2.30 (2 H, m), 3.20-3.30 (1 H, m, one of 6-H2) and 3.52-3.61 (1 H, m, one of 6-H2); *C* (75.4 MHz; CDCl3) 0.1, 14.9, 18.5, 23.8, 25.4, 28.5 (quaternary), 36.0, 38.4, 41.7, 56.7, 79.6, 84.0, 107.9 and 156.1.

**1-(*o*-Iodobenzoyl)-2-methyl-2-[4-(trimethylsilyl)but-3-ynyl]piperidine 16c**

Following the procedure described for the preparation of **16a**, **15c** (440 mg, 1.36 mmol) was treated with trimethylsilyl iodide (312 mg, 1.56 mmol) in acetonitrile (8 cm3) to give the amine, which was then acylated with *o*-iodobenzoyl chloride (692 mg, 2.60 mmol) in the presence of triethylamine (329 mg, 3.25 mmol) and DMAP (79 mg, 0.65 mmol) in benzene (10 cm3). The crude mixture was chromatographed on silica gel [hexane-AcOEt (15:1)] to give **16c** (596 mg, 97%) as a colourless oil (Found: M+, 453.0987. C20H28INOSi requires *M*, 453.0985); max (film)/cm-1 2172 and 1642; *H* (300 MHz; CDCl3) 0.15 (9 H, s, SiMe3), 1.44-2.19 (7 H, m), 1.66 (3 H, s, 2-Me), 2.29-2.53 (3 H, m), 3.04-3.25 (2 H, m), 7.02 (1 H, td, *J* 7.9 and 1.9, ArH), 7.12 and 7.15 (total 1 H, dd each, *J* 7.9 and 1.9, ArH), 7.35 (1 H, t, *J* 7.9, ArH) and 7.80 (1 H, d, *J* 7.9, ArH).
